# Supplementary material for: Canonical and phosphoribosyl ubiquitination coordinate to stabilize a proteinaceous structure surrounding the Legionella-containing vacuole
Source: eLife journal article supplement (doi:10.7554/elife.108254), 2025-09-23
Supplement: fig1-figsupp1-data2 [file Figure 1 source data labeled.pdf › Figure 1, figure supplement 1 - source data 2/Figure 1 source data labeled.pdf]

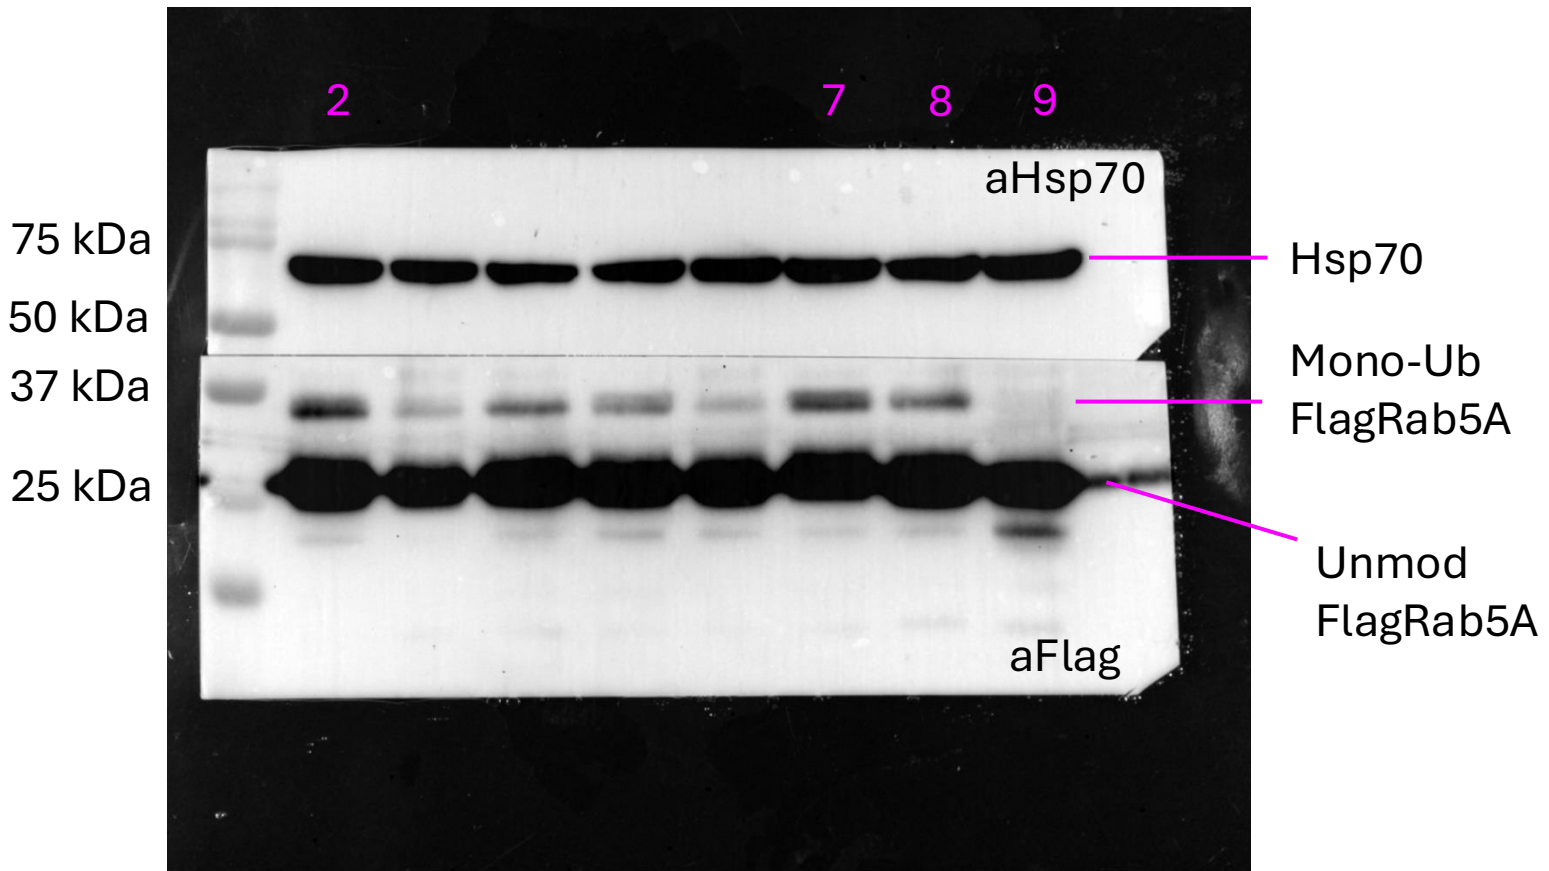

**Source image for Figure 1, supplement 1c.** Colorimetric image of BioRad Precision Plus Dual-Stained ladder (Lane 1) merged with chemiluminescence image. All samples are whole cell lysates from HEK FcGR cells transiently transfected with the indicated construct and infected with *WT Legionella pneumophila* for 5 hours. Note that the second half of the experiment was not discussed in the manuscript and therefore is not labeled here for the sake of clarity.

- Lane 2: Flag-Rab5A WT
- Lane 7: Flag-Rab5A Q79L
- Lane 8: Flag-Rab5A S34N
- Lane 9: Flag-Rab5A 1-211
