# Supplementary material for: Canonical and phosphoribosyl ubiquitination coordinate to stabilize a proteinaceous structure surrounding the Legionella-containing vacuole
Source: eLife journal article supplement (doi:10.7554/elife.108254), 2025-09-23
Supplement: fig2-figsupp1-data2 [file Figure 2, figure supplement 1 source data 2.pdf › Figure 2, figure supplement 1 - source data 2/Figure 2, figure supplement 1 source data 2.pdf]

aHA (HA-ubiquitin dGG)

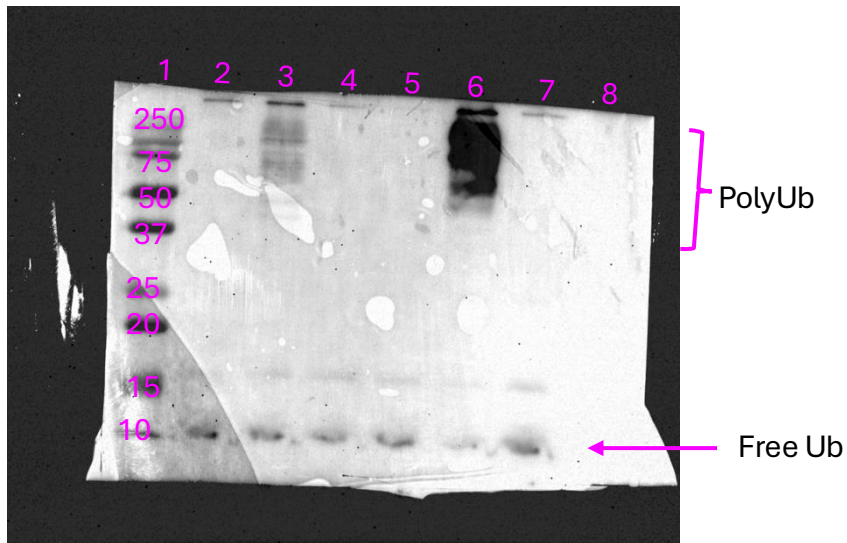

Lanes:

1. Ladder
2. Uninfected
3. WT *L.p.*
4. *dotA L.p.*
5. dSidE family
6. dSidE family + pSdeB
7. dSidE family + pSdeB EE/AA
8. Buffer

aHsp70

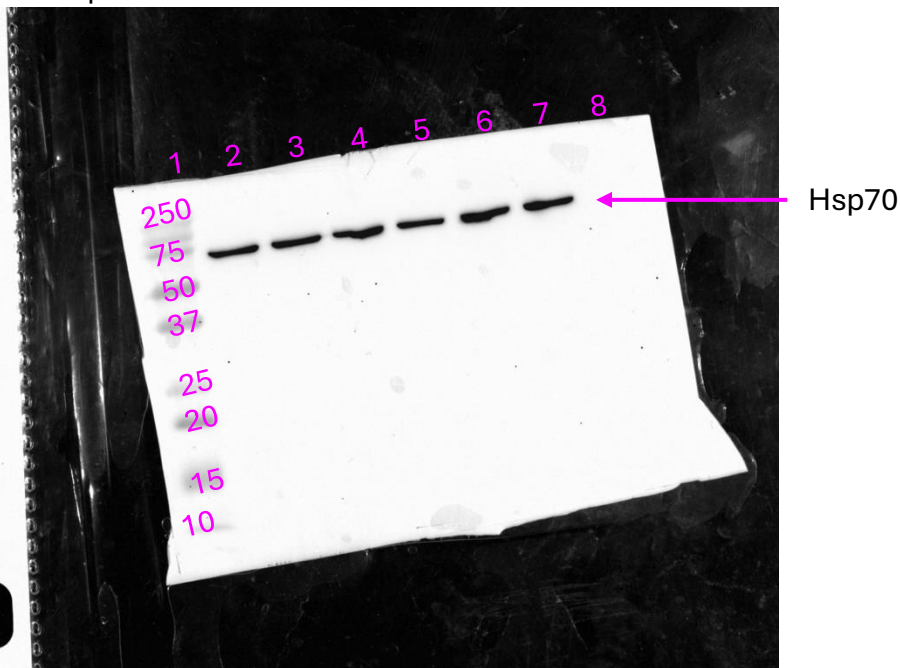

**Source data for Figure 2, supplement 1.** Western blot analysis of HA-Ub DGG conjugation in whole cell lysates prepared from HEK293T FcgR cells infected with the indicated *L.p.* strain for 1 hour. All blots are merged chemiluminescence and colorimetric images of the Dual Stained Precision Plus ladder (BioRad), ladder label units are kDa.
